# Supplementary material
Source: PubMed Central journal article supplement (PMC6759392)
Supplement: NIHMS1532388-supplement-1.pdf [file NIHMS1532388-supplement-1.pdf]

## Supplementary Information

### Supplementary Figure Legends

**Supplementary Figure 1 Epithelial-mesenchymal transition (EMT) occurs in tumors with missense *Trp53* mutation.** The H&E-stained sections of a cecum tumor and representative metastases in the liver and diaphragm arising in a AKP<sup>270/fl</sup> mouse 5 months post TAM injection are shown (top panels). Immunohistochemical stains show strong nuclear expression of  $\beta$ -catenin, loss of E-cadherin expression and strong expression of vimentin in both primary tumor and liver and diaphragm metastases, indicating that EMT has occurred in all the lesions shown here (bottom three panels). Black arrows indicate examples of areas with a loss of E-cadherin expression. The representative photomicrographs of H&E-stained sections were shown with low power magnification for orientation; the serial sections were subjected to immunohistochemical staining and the boxed area with stains for  $\beta$ -catenin, E-cadherin and vimentin were shown as high power magnification. Scale bars: 20  $\mu$ m for all the images.

**Supplementary Figure 2 CDX2 expression in mouse colon tumors with missense *Trp53* mutation.** Immunohistochemical staining of CDX2 in primary and metastatic lesions arising in two representative AKP<sup>270/fl</sup> mice after TAM induction. Strong CDX2 expression is found in moderately differentiated lung and lymph node metastases in one mouse (panel A, lymph node 1 and lung 1), while the primary and metastatic lesions that have undergone EMT in the second mouse show reduced CDX2 expression (in cecum, and lung, liver, diaphragm metastases, panel B) or very weak CDX2 expression (in lymph node metastasis, panel B). Scale bars: 20  $\mu$ m.

**Supplementary Figure 3 The primary and metastatic lesions arising in a  $AKP^{fl/fl}$  mouse after TAM injection.** H&E stains (left panels) and immunohistochemical stains for  $\beta$ -catenin (right panels) are shown for the primary tumors (A, proximal colon and cecum) and the metastatic lesions (B, lymph node and liver) arising in  $AKP^{fl/fl}$  mouse after TAM injection. (C) Immunohistochemical staining of E-cadherin for the tumors described in (A and B) showed that both the primary and the metastatic lesions found in this mouse still maintain the epithelial profile. The dashed lines indicate the boundary of the muscularis propria. Scale bars: 100  $\mu$ m for panels A and B; 20  $\mu$ m for panel C.

**Supplementary Figure 4 CDX2 expression in mouse colon tumors with null *Trp53* mutation.** Immunohistochemical staining of CDX2 in primary and metastatic lesions arising in three  $AKP^{fl/fl}$  mice after TAM injection. (A) Weak CDX2 expression is found in moderately differentiated lymph node metastasis from the mouse described in Fig. 4a. (B) and (C) Strong CDX2 expression is found in primary and metastatic lesions in mice that have been described in Fig. 4b and Supplementary Figure 3B, respectively. Scale bars: 20  $\mu$ m.

**Supplementary Figure 5 Principal component (PC) analyses of gene expression and the distances between pairs of samples in the full space for mouse colon tumors with mutant *Trp53*.** Total RNA was extracted from laser capture microdissected (LCM) colon tumor samples generated in  $AKP^{270/fl}$  mice (n=6) or  $AKP^{fl/fl}$  (n=6) mice 3 months post TAM injection. Microdissected wild-type colon cells were used as controls (WT cont, n=3). The first 5 principal components (PC) for log<sub>2</sub>-transformed mRNA array data using all 24562 probe-sets are shown.

**Supplementary Figure 6 Principal component (PC) analyses of gene expression and the distances between pairs of samples in the full space for organoids derived from the mouse colon tumors with mutant *Trp53*.** Total RNA was extracted from organoids derived from colon tumors generated in AKP<sup>270<sup>fl</sup></sup> mice (n=3) or AKP<sup>fl/fl</sup> mice (n=2) 3 months post TAM injection. The organoids derived from the adenomas in the *Apc*<sup>fl/fl</sup> mice (Cont 1, after 15 days post TAM injection, n=3) and wild-type colon epithelium (Cont 2, n=4) were used as controls. The first 5 principal components (PC) for log2-transformed mRNA array data, and the distances between pairs of samples for all 24562 probe-sets are shown.

**Supplementary Figure 7 Principal component (PC) analyses of gene expression in human colorectal tumors from TCGA database.** We compared 9 tumors with TP53 codon 273 mutations to 36 tumors with null mutations (caused by frame shift, splice site, and nonsense mutations, see Supplementary Table 3 for details) by analyzing log2-transformed normalized counts (after adding 1 to each value) for colorectal data from TCGA. The first 5 PCs are shown.

Supplementary Figure 1

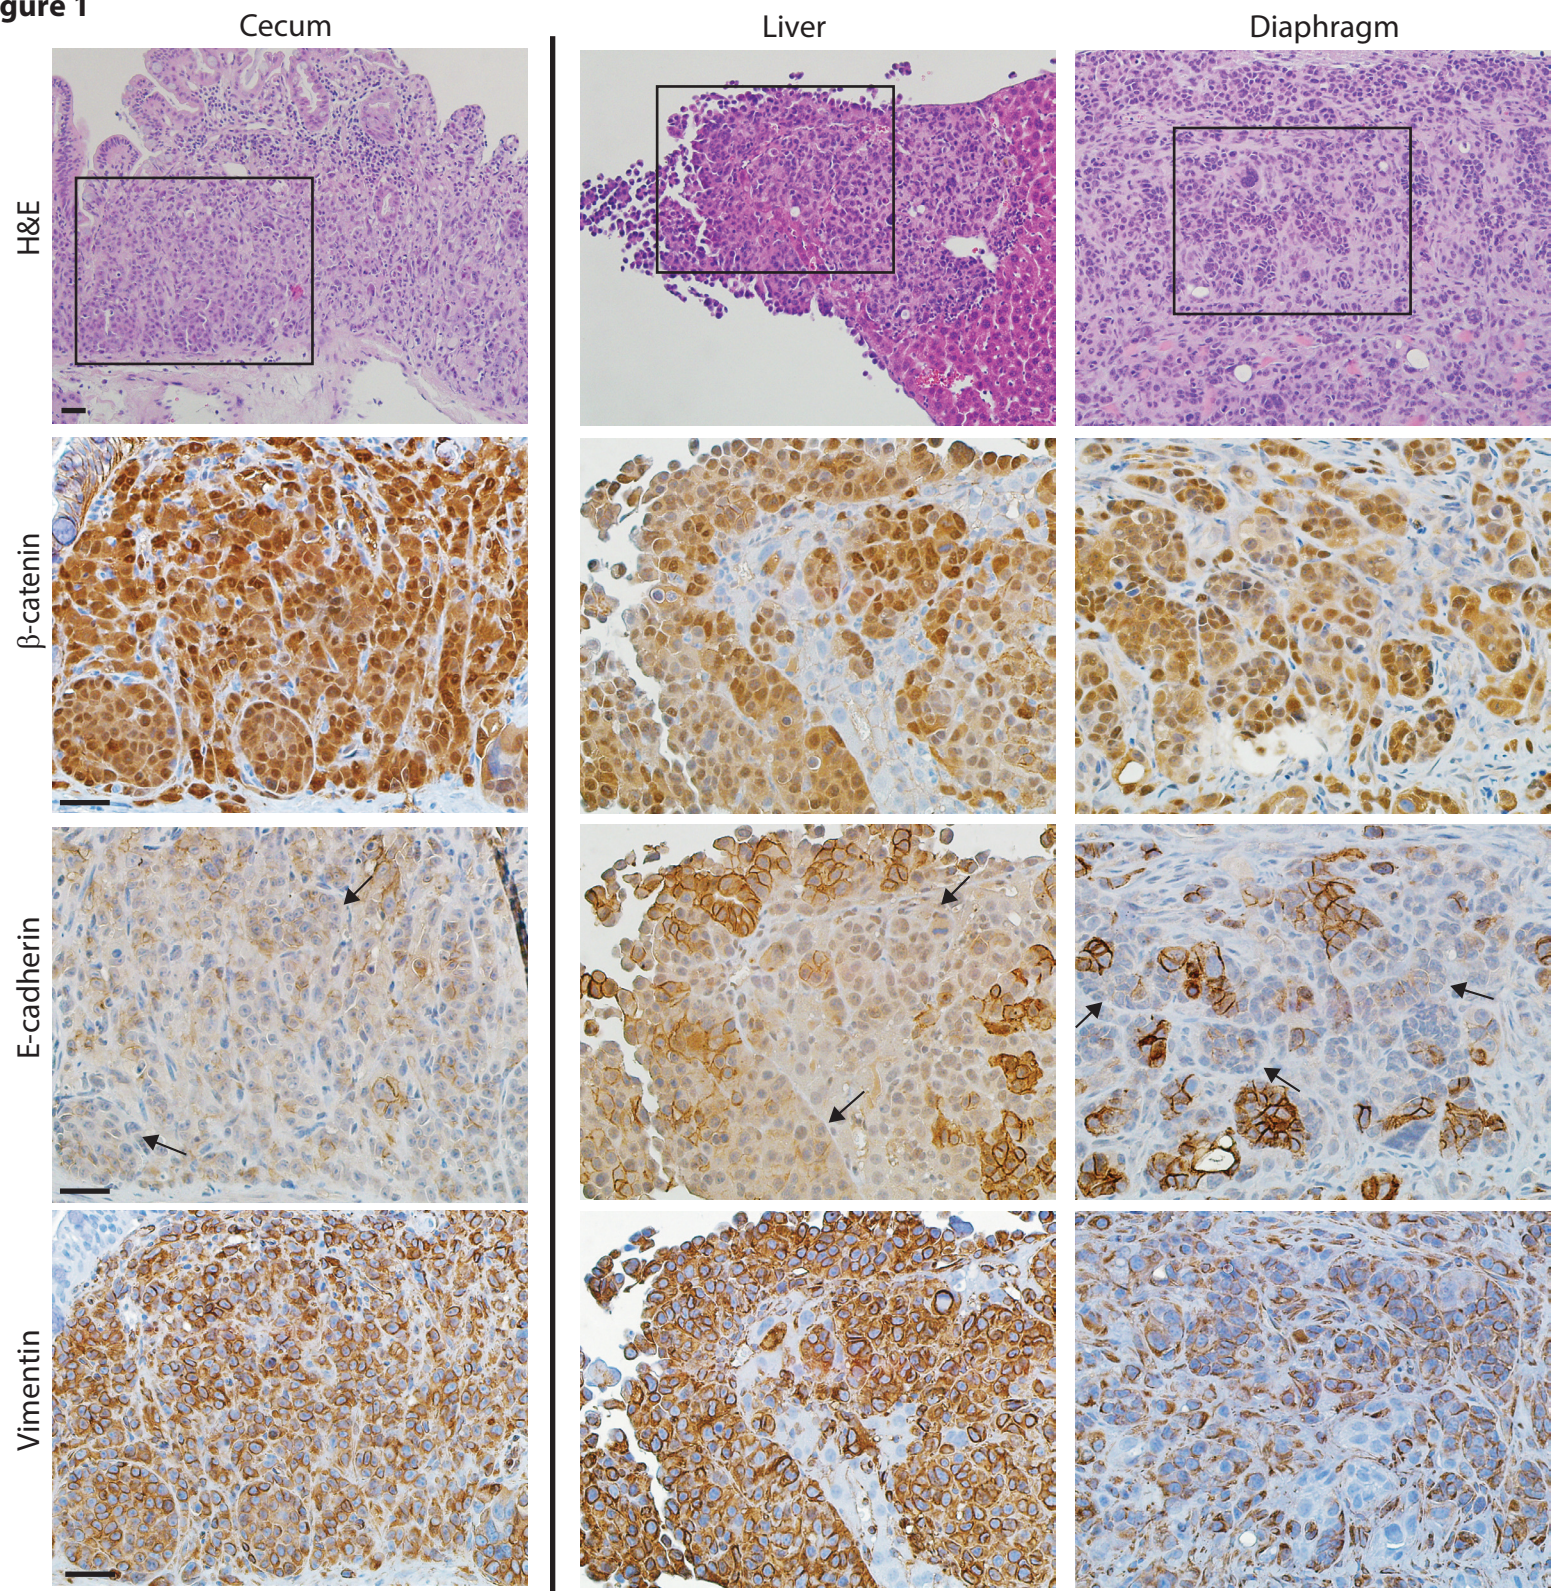

## Supplementary Figure 2

A

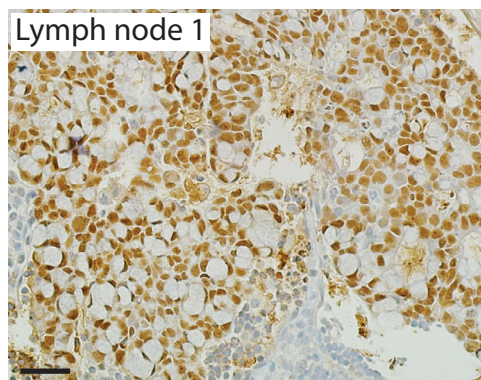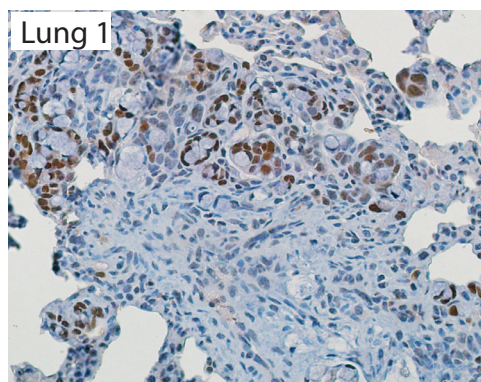

B

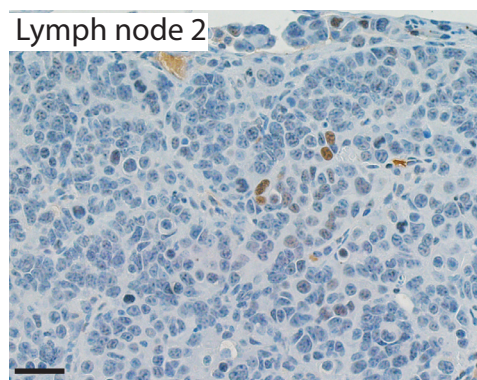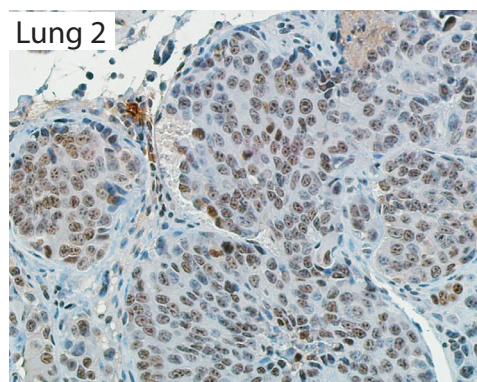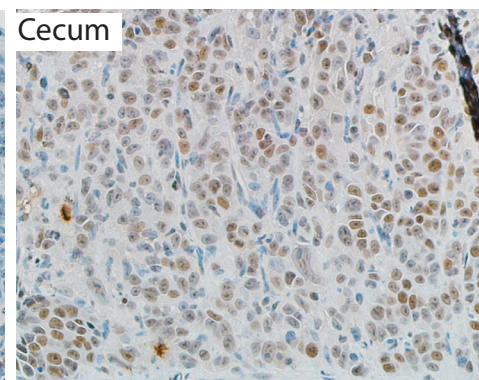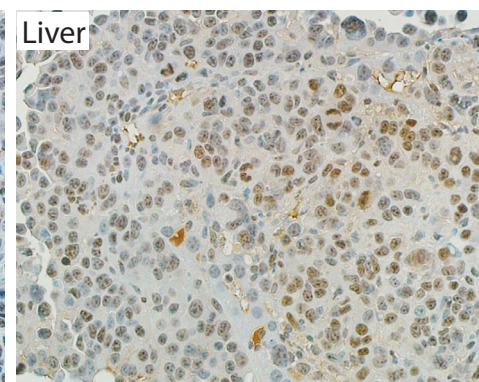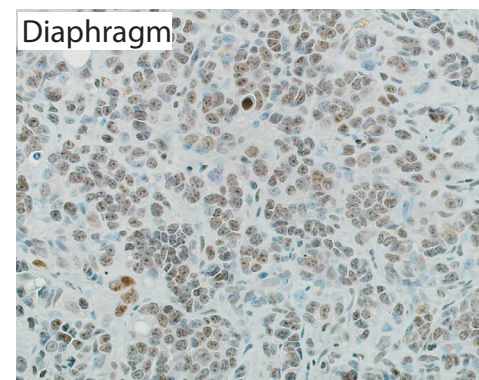

# Supplementary Figure 3

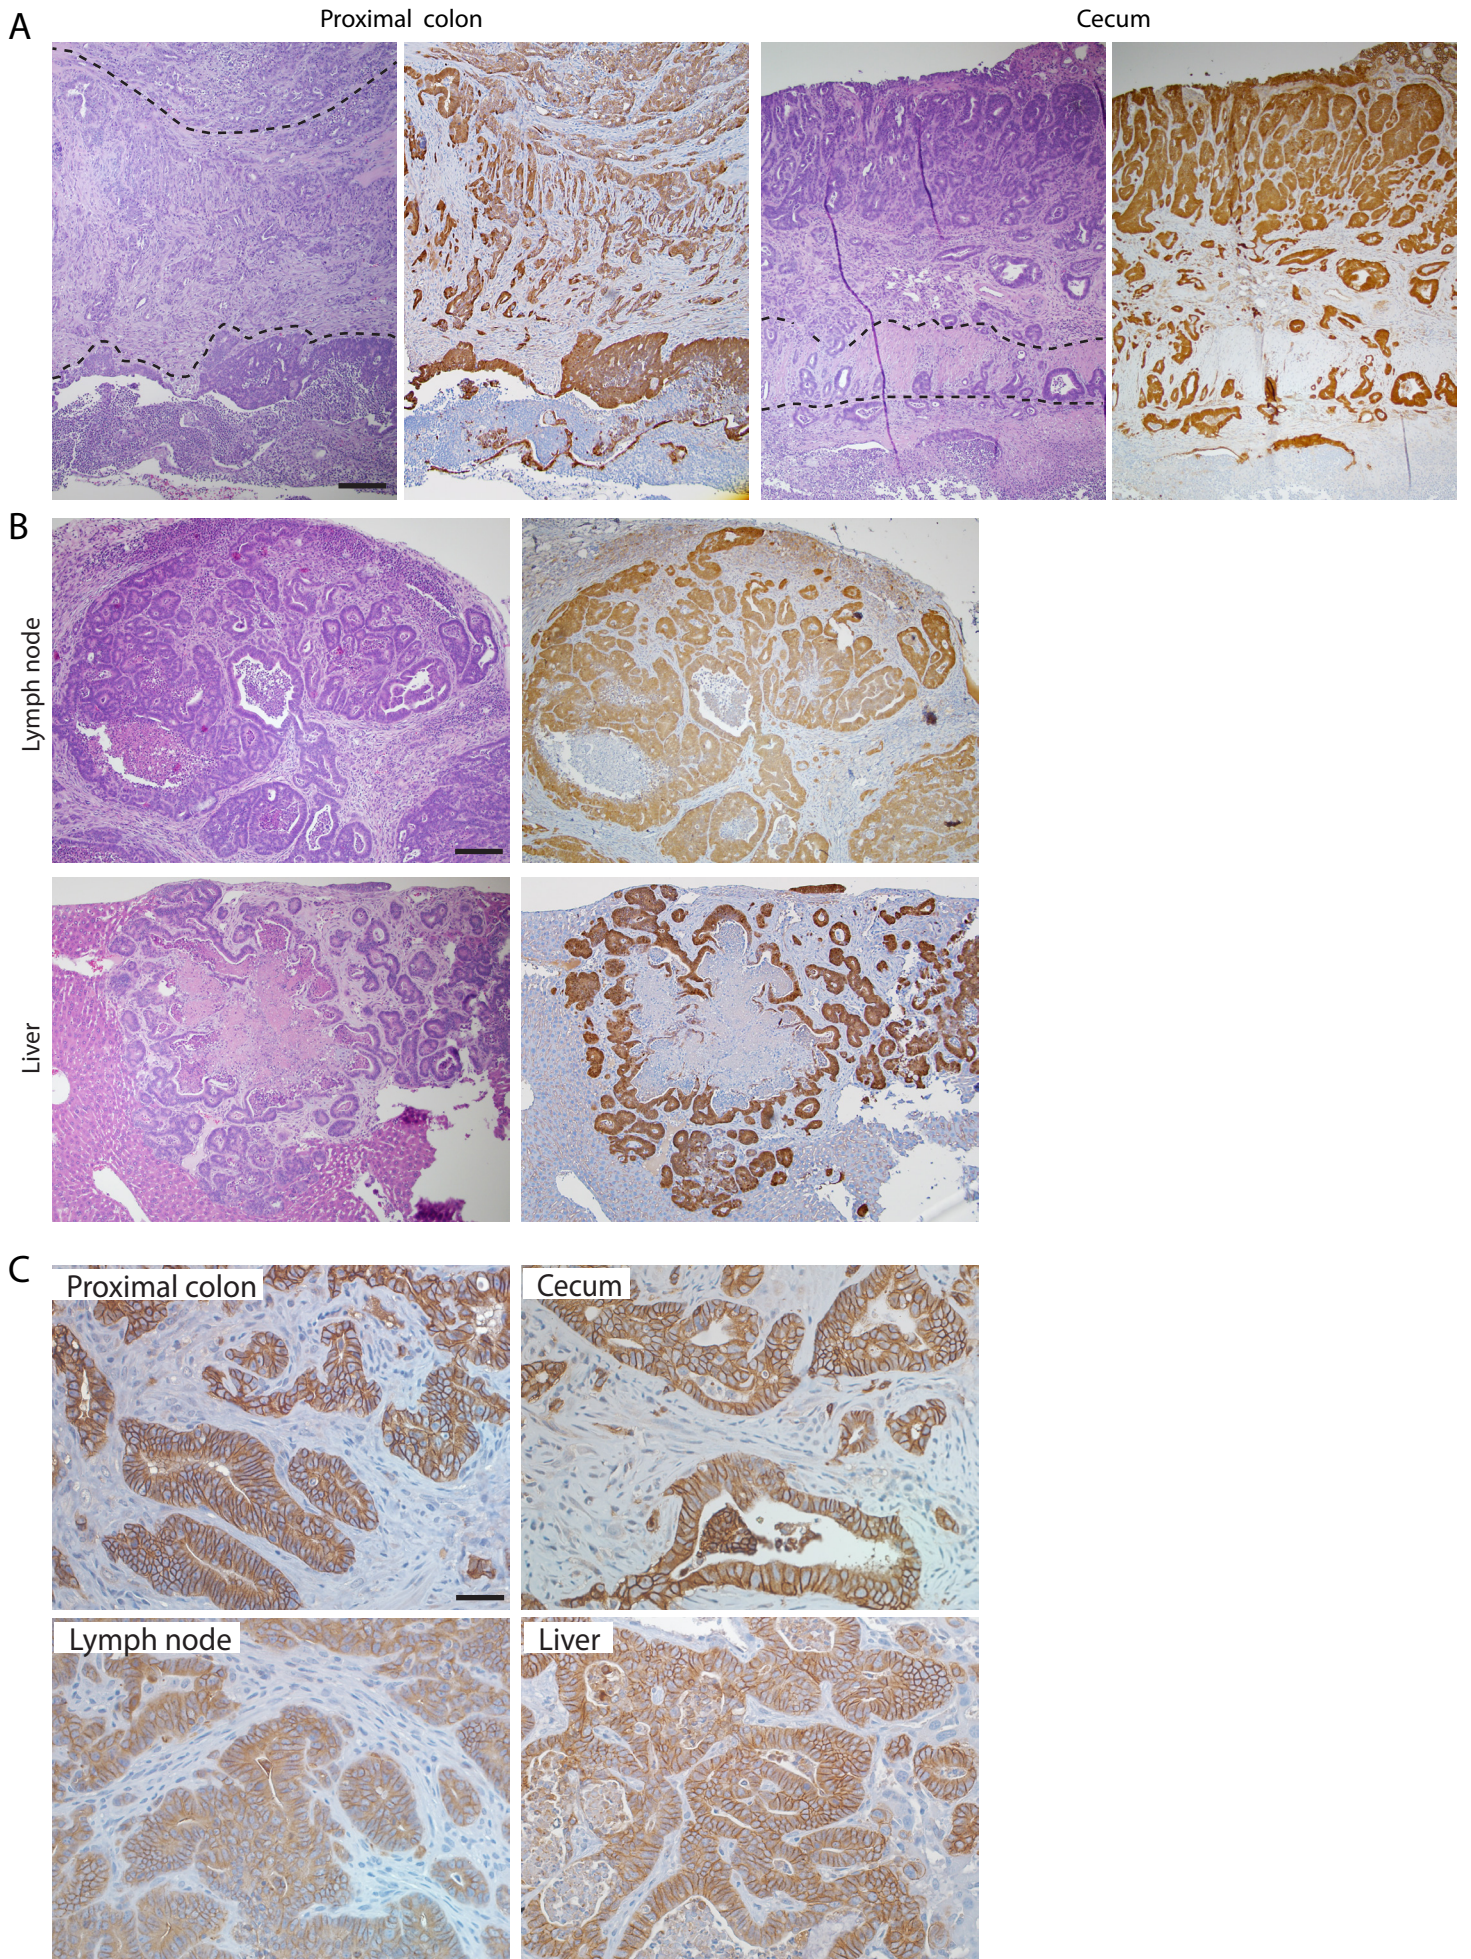

Supplementary Figure 4

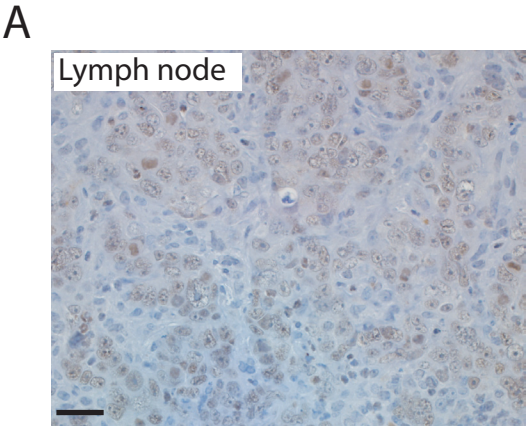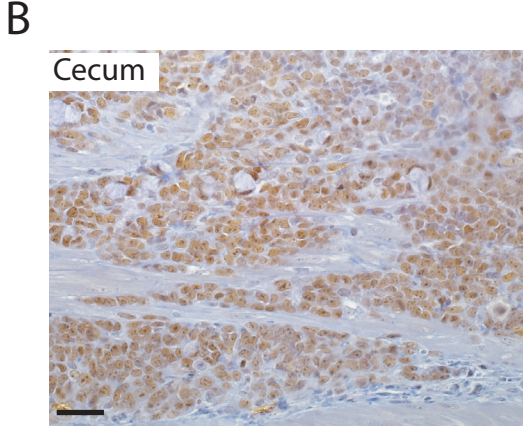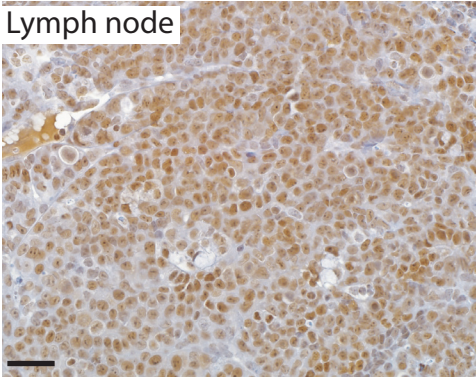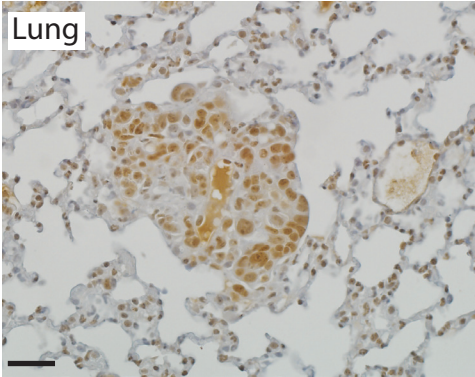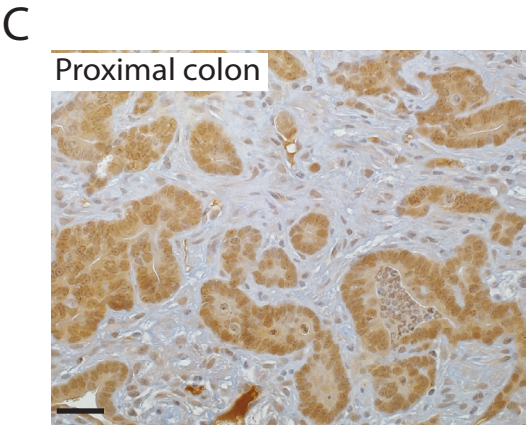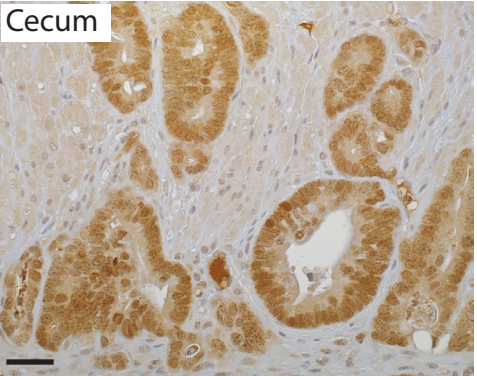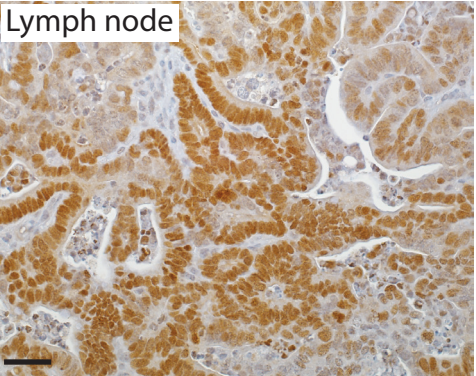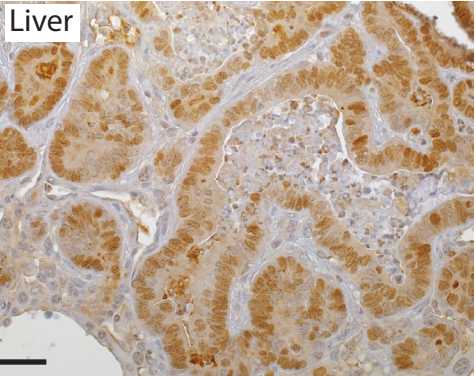

Supplementary Figure 5

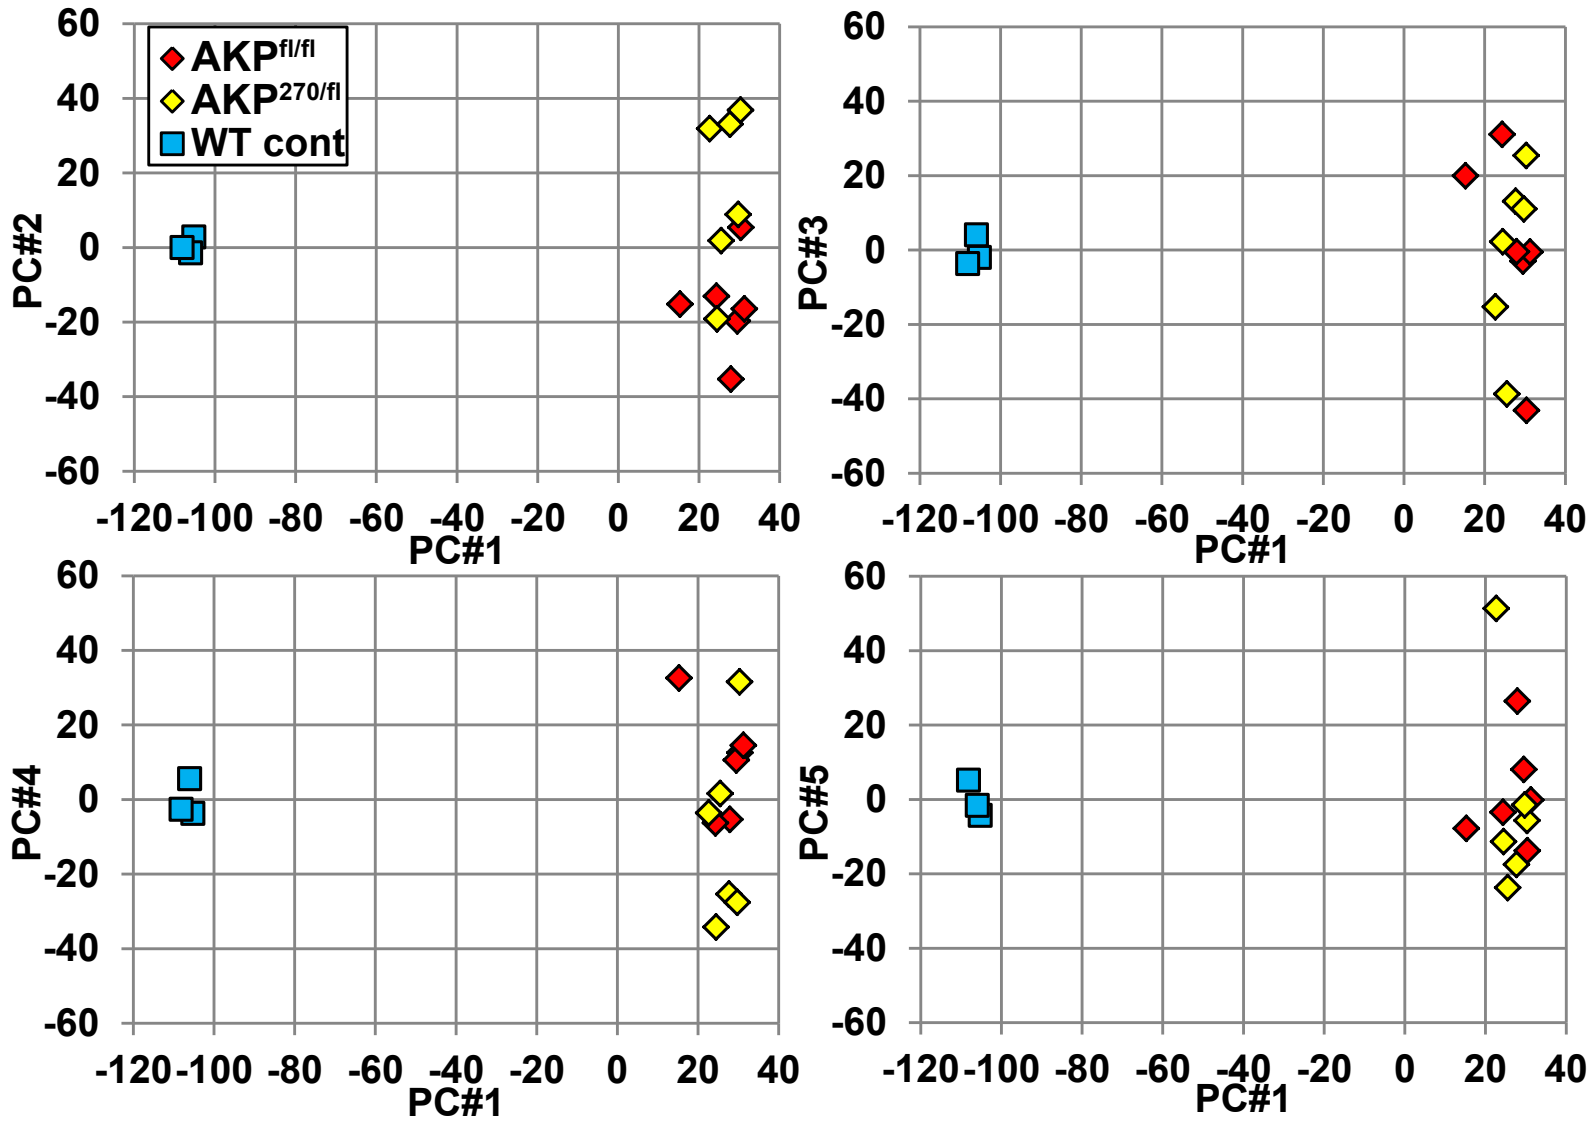

Distances between samples

|                       | AKP <sup>fl/fl</sup> | AKP <sup>270/fl</sup> | WT cont | WT cont | WT cont |
|-----------------------|----------------------|----------------------|----------------------|----------------------|----------------------|----------------------|-----------------------|-----------------------|-----------------------|-----------------------|-----------------------|-----------------------|---------|---------|---------|
| AKP <sup>fl/fl</sup>  | 0                    | 88                   | 82                   | 95                   | 98                   | 97                   | 95                    | 82                    | 96                    | 98                    | 94                    | 97                    | 157     | 157     | 158     |
| AKP <sup>fl/fl</sup>  | 88                   | 0                    | 75                   | 85                   | 87                   | 89                   | 94                    | 90                    | 94                    | 95                    | 91                    | 91                    | 153     | 154     | 156     |
| AKP <sup>fl/fl</sup>  | 82                   | 75                   | 0                    | 81                   | 81                   | 81                   | 92                    | 84                    | 90                    | 91                    | 87                    | 89                    | 153     | 152     | 156     |
| AKP <sup>fl/fl</sup>  | 95                   | 85                   | 81                   | 0                    | 90                   | 96                   | 99                    | 95                    | 100                   | 103                   | 93                    | 94                    | 155     | 155     | 157     |
| AKP <sup>fl/fl</sup>  | 98                   | 87                   | 81                   | 90                   | 0                    | 89                   | 98                    | 95                    | 91                    | 95                    | 92                    | 90                    | 151     | 151     | 154     |
| AKP <sup>fl/fl</sup>  | 97                   | 89                   | 81                   | 96                   | 89                   | 0                    | 100                   | 96                    | 99                    | 97                    | 96                    | 97                    | 146     | 144     | 148     |
| AKP <sup>270/fl</sup> | 95                   | 94                   | 92                   | 99                   | 98                   | 100                  | 0                     | 95                    | 96                    | 98                    | 96                    | 100                   | 153     | 153     | 154     |
| AKP <sup>270/fl</sup> | 82                   | 90                   | 84                   | 95                   | 95                   | 96                   | 95                    | 0                     | 94                    | 99                    | 95                    | 93                    | 152     | 153     | 155     |
| AKP <sup>270/fl</sup> | 96                   | 94                   | 90                   | 100                  | 91                   | 99                   | 96                    | 94                    | 0                     | 95                    | 89                    | 98                    | 155     | 155     | 158     |
| AKP <sup>270/fl</sup> | 98                   | 95                   | 91                   | 103                  | 95                   | 97                   | 98                    | 99                    | 95                    | 0                     | 97                    | 102                   | 159     | 158     | 161     |
| AKP <sup>270/fl</sup> | 94                   | 91                   | 87                   | 93                   | 92                   | 96                   | 96                    | 95                    | 89                    | 97                    | 0                     | 94                    | 156     | 156     | 158     |
| AKP <sup>270/fl</sup> | 97                   | 91                   | 89                   | 94                   | 90                   | 97                   | 100                   | 93                    | 98                    | 102                   | 94                    | 0                     | 153     | 154     | 155     |
| WT cont               | 157                  | 153                  | 153                  | 155                  | 151                  | 146                  | 153                   | 152                   | 155                   | 159                   | 156                   | 153                   | 0       | 79      | 83      |
| WT cont               | 157                  | 154                  | 152                  | 155                  | 151                  | 144                  | 153                   | 153                   | 155                   | 158                   | 156                   | 154                   | 79      | 0       | 79      |
| WT cont               | 158                  | 156                  | 156                  | 157                  | 154                  | 148                  | 154                   | 155                   | 158                   | 161                   | 158                   | 155                   | 83      | 79      | 0       |



Supplementary Figure 6

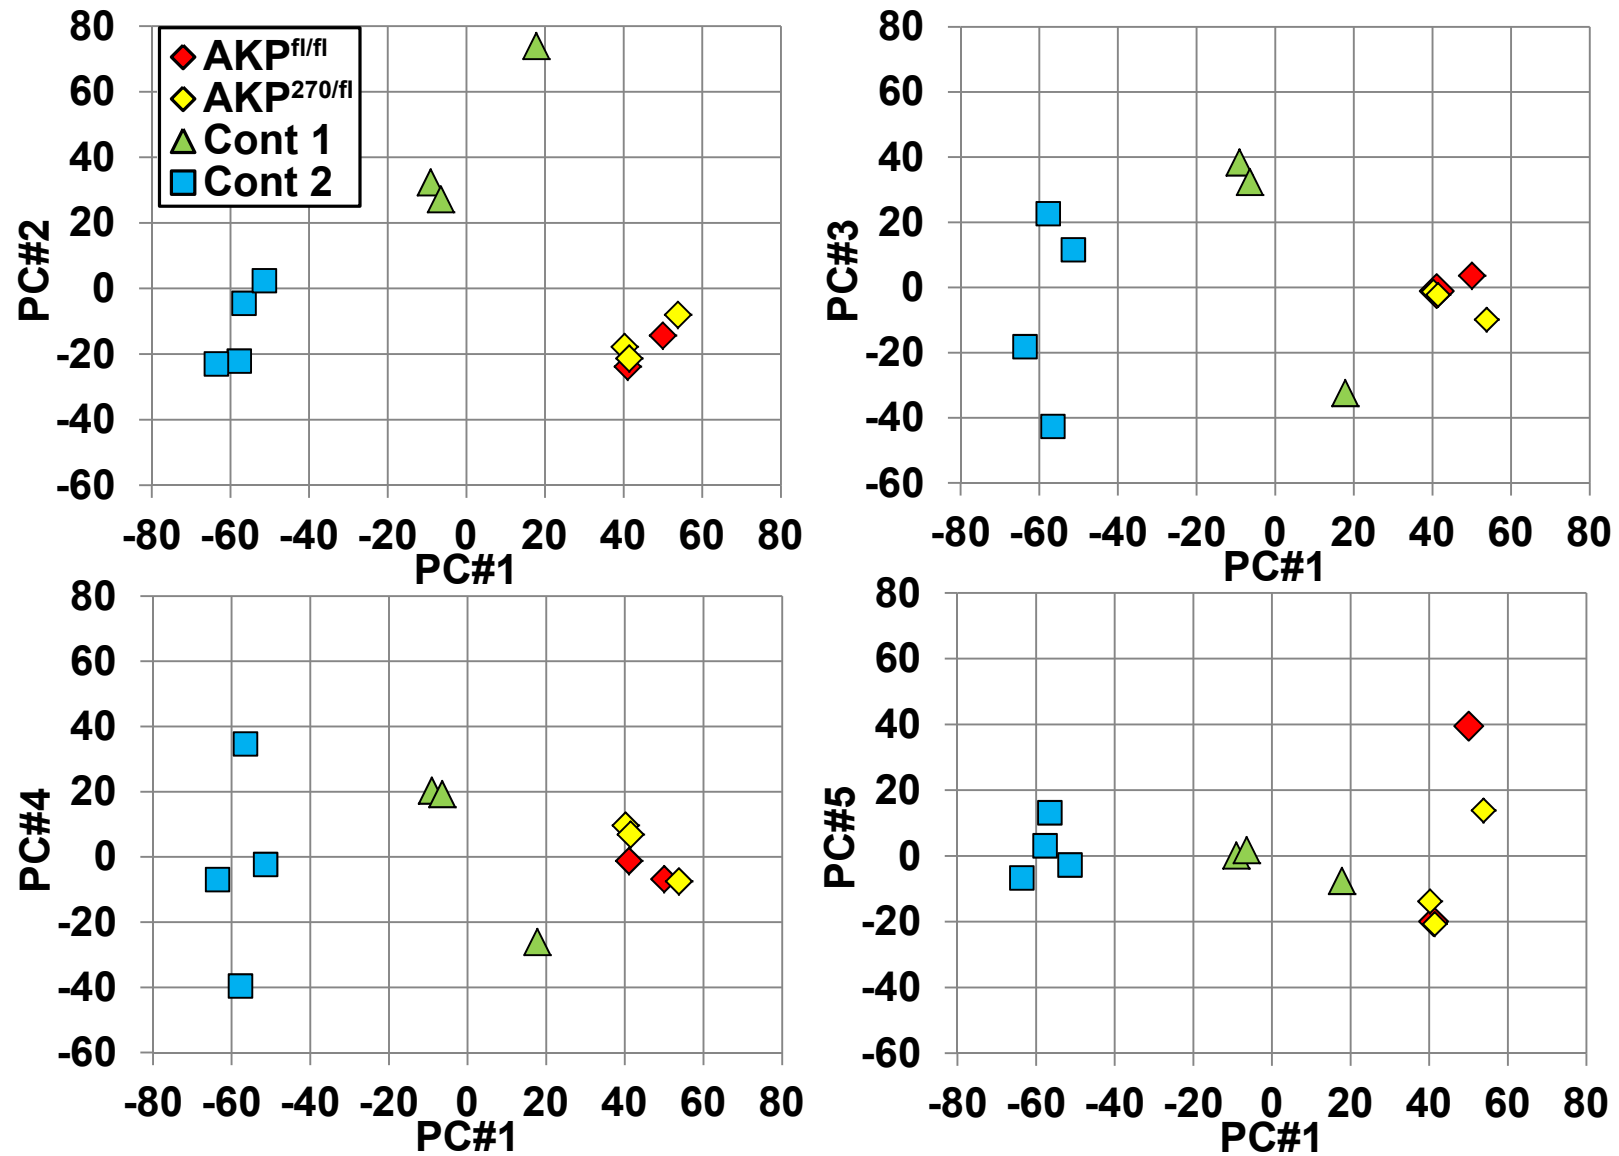

Distances between samples

|                       | AKP <sup>fl/fl</sup> | AKP <sup>fl/fl</sup> | AKP <sup>270/fl</sup> | AKP <sup>270/fl</sup> | AKP <sup>270/fl</sup> | Cont 1 | Cont 1 | Cont 1 | Cont 2 | Cont 2 | Cont 2 | Cont 2 |
|-----------------------|----------------------|----------------------|-----------------------|-----------------------|-----------------------|--------|--------|--------|--------|--------|--------|--------|
| AKP <sup>fl/fl</sup>  | 0                    | 73                   | 74                    | 69                    | 73                    | 114    | 102    | 96     | 127    | 132    | 131    | 121    |
| AKP <sup>fl/fl</sup>  | 73                   | 0                    | 66                    | 73                    | 58                    | 115    | 100    | 94     | 119    | 123    | 122    | 113    |
| AKP <sup>270/fl</sup> | 74                   | 66                   | 0                     | 70                    | 63                    | 113    | 95     | 91     | 121    | 121    | 121    | 113    |
| AKP <sup>270/fl</sup> | 69                   | 73                   | 70                    | 0                     | 67                    | 107    | 103    | 98     | 131    | 131    | 132    | 123    |
| AKP <sup>270/fl</sup> | 73                   | 58                   | 63                    | 67                    | 0                     | 114    | 97     | 91     | 122    | 122    | 120    | 111    |
| Cont 1                | 114                  | 115                  | 113                   | 107                   | 114                   | 0      | 102    | 99     | 137    | 128    | 135    | 120    |
| Cont 1                | 102                  | 100                  | 95                    | 103                   | 97                    | 102    | 0      | 46     | 102    | 108    | 108    | 84     |
| Cont 1                | 96                   | 94                   | 91                    | 98                    | 91                    | 99     | 46     | 0      | 100    | 104    | 104    | 83     |
| Cont 2                | 127                  | 119                  | 121                   | 131                   | 122                   | 137    | 102    | 100    | 0      | 102    | 80     | 75     |
| Cont 2                | 132                  | 123                  | 121                   | 131                   | 122                   | 128    | 108    | 104    | 102    | 0      | 80     | 85     |
| Cont 2                | 131                  | 122                  | 121                   | 132                   | 120                   | 135    | 108    | 104    | 80     | 80     | 0      | 79     |
| Cont 2                | 121                  | 113                  | 113                   | 123                   | 111                   | 120    | 84     | 83     | 75     | 85     | 79     | 0      |

Supplementary Figure 7

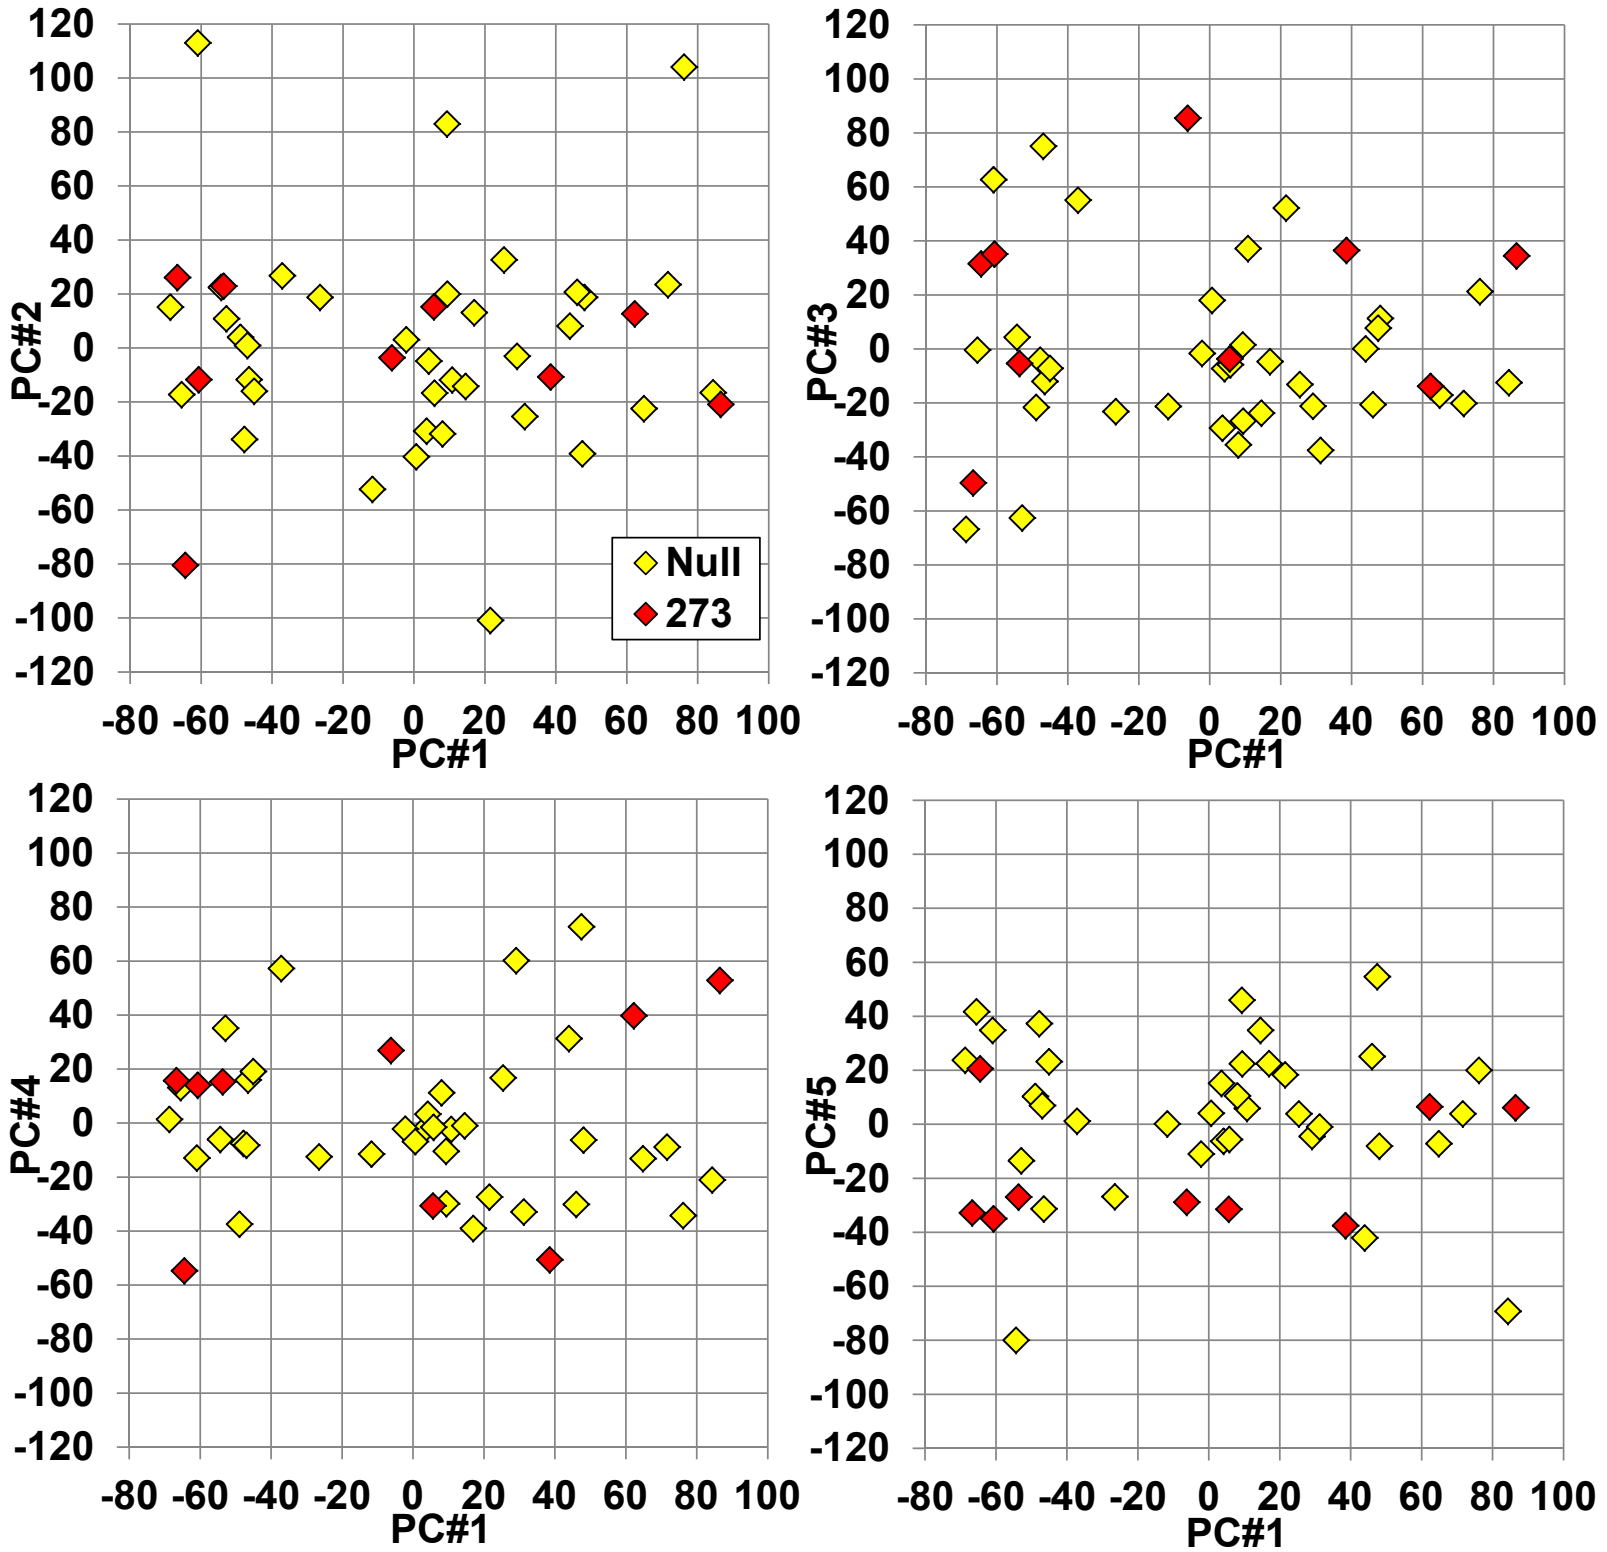

**Supplementary Table 1. *P*-values of Exact Poisson Tests**

| #Mice                  |                             | 10        | 10                         | 13                         | 14                          |
|------------------------|-----------------------------|-----------|----------------------------|----------------------------|-----------------------------|
| <b>Rates per mouse</b> | <b>SM or worse</b>          | 0.8       | 2.2                        | 7.3                        | 8.9                         |
| <b>All lesions</b>     |                             | <b>AK</b> | <b>AKP<sup>270/+</sup></b> | <b>AKP<sup>fl/fl</sup></b> | <b>AKP<sup>270/fl</sup></b> |
| 13.1                   | <b>AK</b>                   |           | 0.016                      | 1.4E-15                    | 2.2E-16                     |
| 18.5                   | <b>AKP<sup>270/+</sup></b>  | 0.0028    |                            | 2.1E-08                    | 3.5E-12                     |
| 28.0                   | <b>AKP<sup>fl/fl</sup></b>  | 5.1E-15   | 3.1E-06                    |                            | 0.16                        |
| 24.2                   | <b>AKP<sup>270/fl</sup></b> | 6.8E-10   | 0.0034                     | 0.054                      |                             |

*P*-values below the diagonal test differences in the total number of lesions, while those above the diagonal test "SM or worse". AKP<sup>fl/fl</sup> has slightly more lesions than AKP<sup>270/fl</sup> (28.0 vs 24.2 per mouse, *P* = .054), but slightly less "SM or worse" lesions (7.3 vs 8.9 per mouse, *P* = .16).

**Supplementary table 2. Top 10 gene sets for list of genes up- or down-regulated in both AKP<sup>270/fl</sup> and AKP<sup>fl/fl</sup> tumor cells compared to wild-type cells for both tissues and organoids ( $P < .05$ , FC > 1.3)**

| Regulation | Gene set title                    | Number of genes in gene set | Number of those genes we selected | P-value, one-sided Fisher Exact Test | Number of gene sets that good in our data | Estimated False discovery rate, based on 100 permuted data-sets | Observed / Expected |
|------------|-----------------------------------|-----------------------------|-----------------------------------|--------------------------------------|-------------------------------------------|-----------------------------------------------------------------|---------------------|
| Up         | G2M_CHECKPOINT                    | 186                         | 24                                | 1.89E-09                             | 1                                         | 0                                                               | 4.29                |
| Up         | E2F_TARGETS                       | 195                         | 20                                | 1.82E-06                             | 2                                         | 0                                                               | 3.41                |
| Up         | HYPOXIA                           | 188                         | 19                                | 4.09E-06                             | 3                                         | 0                                                               | 3.36                |
| Up         | MITOTIC_SPINDLE                   | 193                         | 17                                | 7.64E-05                             | 4                                         | 0                                                               | 2.93                |
| Up         | UNFOLDED_PROTEIN_RESPONSE         | 108                         | 11                                | 0.00041                              | 5                                         | 0.002                                                           | 3.38                |
| Up         | GLYCOLYSIS                        | 192                         | 15                                | 0.00072                              | 6                                         | 0.0033                                                          | 2.6                 |
| Up         | TNFA_SIGNALING_VIA_NFKB           | 189                         | 14                                | 0.0018                               | 7                                         | 0.0043                                                          | 2.46                |
| Up         | MTORC1_SIGNALING                  | 191                         | 14                                | 0.002                                | 8                                         | 0.0038                                                          | 2.44                |
| Up         | EPITHELIAL_MESENCHYMAL_TRANSITION | 184                         | 13                                | 0.0038                               | 9                                         | 0.0089                                                          | 2.35                |
| Up         | IL2_STAT5_SIGNALING               | 192                         | 12                                | 0.014                                | 10                                        | 0.048                                                           | 2.08                |
| Down       | PEROXISOME                        | 101                         | 15                                | 2.84E-06                             | 1                                         | 0                                                               | 4.16                |
| Down       | INTERFERON_GAMMA_RESPONSE         | 177                         | 20                                | 5.38E-06                             | 2                                         | 0                                                               | 3.16                |
| Down       | XENOBIOTIC_METABOLISM             | 192                         | 20                                | 1.82E-05                             | 3                                         | 0                                                               | 2.92                |
| Down       | FATTY_ACID_METABOLISM             | 145                         | 16                                | 6.18E-05                             | 4                                         | 0                                                               | 3.09                |
| Down       | BILE_ACID_METABOLISM              | 109                         | 13                                | 0.00014                              | 5                                         | 0                                                               | 3.34                |
| Down       | ESTROGEN_RESPONSE_EARLY           | 190                         | 18                                | 0.00016                              | 6                                         | 0                                                               | 2.65                |
| Down       | REACTIVE_OXIGEN_SPECIES_PATHWAY   | 46                          | 8                                 | 0.0002                               | 7                                         | 0                                                               | 4.87                |
| Down       | APOPTOSIS                         | 153                         | 15                                | 0.00039                              | 8                                         | 0                                                               | 2.75                |
| Down       | ADIPOGENESIS                      | 191                         | 16                                | 0.0014                               | 9                                         | 0.0044                                                          | 2.35                |
| Down       | ANDROGEN_RESPONSE                 | 94                          | 10                                | 0.0019                               | 10                                        | 0.006                                                           | 2.98                |

Methods: We mapped mouse genes to human homologs using only 1-to-1 best homologs from NCBI Homologene build 68, giving 15850 distinct genes. We asked that comparisons of AKP<sup>270/fl</sup> and AKP<sup>fl/fl</sup> tumor cells give  $P < .05$  and fold-changes of at least 1.3 fold compared to wild-type cells for both the tissue and organoid analyses (the intersection of 4 comparisons) and obtained 477 up and 566 down genes. We used one-sided Fisher Exact Tests to ask if the intersection of our up and down gene lists with 50 Hallmark gene sets from the Molecular Signatures Database (MSigDB v6.1, <http://www.broadinstitute.org/gsea/msigdb/index.jsp>) were larger than expected by chance. We estimated false discover rates (FDRs) based on similar tests of 100 data sets in which the identities of our 15850 genes were randomly permuted, and estimated the FDR as the average number of gene sets giving  $P$ -values smaller than  $P$  in the permuted data sets, divided by the number of gene sets with  $P$ -values that small in the actual data. The last column is the number of genes in the intersections divided by the number expected by chance given the size of our list and the size of the gene set.

**Supplementary Table 3. TCGA samples used for comparison of TP53 null mutations with mutations at amino acid 273.**

| Sample          | TP53 mutation | Variant classification | TP53 group |
|-----------------|---------------|------------------------|------------|
| TCGA-AA-3949-01 | p.R273H       | Missense_Mutation      | 273        |
| TCGA-AA-3556-01 | p.R273H       | Missense_Mutation      | 273        |
| TCGA-AA-3561-01 | p.R273C       | Missense_Mutation      | 273        |
| TCGA-AA-3844-01 | p.R273C       | Missense_Mutation      | 273        |
| TCGA-AA-A01D-01 | p.R273H       | Missense_Mutation      | 273        |
| TCGA-AY-4070-01 | p.R273C       | Missense_Mutation      | 273        |
| TCGA-AG-3578-01 | p.R273H       | Missense_Mutation      | 273        |
| TCGA-AG-3581-01 | p.R273H       | Missense_Mutation      | 273        |
| TCGA-AG-3587-01 | p.R273H       | Missense_Mutation      | 273        |
| TCGA-AA-3811-01 | p.H179fs      | Frame_Shift_Del        | null       |
| TCGA-AG-A02N-01 | p.T125M       | Splice_Site            | null       |
| TCGA-AA-3517-01 | p.Q331H       | Splice_Site            | null       |
| TCGA-AA-3866-01 | p.C176*       | Nonsense_Mutation      | null       |
| TCGA-AA-3930-01 | p.R306*       | Nonsense_Mutation      | null       |
| TCGA-AA-3972-01 | p.R342*       | Nonsense_Mutation      | null       |
| TCGA-AA-A00O-01 | p.PS98fs      | Frame_Shift_Del        | null       |
| TCGA-AA-A02W-01 | p.R196*       | Nonsense_Mutation      | null       |
| TCGA-AG-4001-01 | p.V122fs      | Frame_Shift_Del        | null       |
| TCGA-A6-2678-01 | p.R196*       | Nonsense_Mutation      | null       |
| TCGA-A6-3807-01 | p.Y236*       | Nonsense_Mutation      | null       |
| TCGA-AA-3524-01 | p.R306*       | Nonsense_Mutation      | null       |
| TCGA-AA-3560-01 | p.F212fs      | Frame_Shift_Del        | null       |
| TCGA-AA-3673-01 | p.T125T       | Splice_Site            | null       |
| TCGA-AA-3842-01 | p.R335fs      | Frame_Shift_Del        | null       |
| TCGA-AA-3848-01 | p.I195fs      | Frame_Shift_Ins        | null       |
| TCGA-AA-3856-01 | p.P322fs      | Frame_Shift_Del        | null       |
| TCGA-AA-3858-01 | p.L35fs       | Frame_Shift_Ins        | null       |
| TCGA-AA-3860-01 | p.P60fs       | Frame_Shift_Del        | null       |
| TCGA-AA-3867-01 | p.P27fs       | Frame_Shift_Del        | null       |
| TCGA-AA-3955-01 | p.LRK289fs    | Frame_Shift_Del        | null       |
| TCGA-AA-3977-01 | p.R213*       | Nonsense_Mutation      | null       |
| TCGA-AA-A00D-01 | p.R196*       | Nonsense_Mutation      | null       |
| TCGA-AA-A01Z-01 | p.Q331fs      | Frame_Shift_Ins        | null       |
| TCGA-AG-3890-01 | p.R335fs      | Frame_Shift_Ins        | null       |
| TCGA-AG-3898-01 | p.PK318fs     | Frame_Shift_Ins        | null       |
| TCGA-AG-4005-01 | p.R306*       | Nonsense_Mutation      | null       |
| TCGA-AG-4015-01 | p.Q331*       | Nonsense_Mutation      | null       |
| TCGA-AG-A01Y-01 | p.R306*       | Nonsense_Mutation      | null       |
| TCGA-AG-A026-01 | p.S33fs       | Splice_Site            | null       |
| TCGA-AG-A02X-01 | p.E285*       | Nonsense_Mutation      | null       |
| TCGA-AA-3553-01 | p.R213*       | Nonsense_Mutation      | null       |
| TCGA-A6-2674-01 | p.R213*       | Nonsense_Mutation      | null       |
| TCGA-AA-3980-01 | p.R213*       | Nonsense_Mutation      | null       |
| TCGA-AG-3594-01 | p.R213*       | Nonsense_Mutation      | null       |
| TCGA-AG-3999-01 | p.R213*       | Nonsense_Mutation      | null       |

**Supplementary Table 4. Genes in the two-way intersections between 3 studies for weak selection ( $P < .05$ , FC  $>1.3$ )**

| Symbol        | Organoids AKP <sup>fl/fl</sup> vs. AKP <sup>270/fl</sup> |              | Tissues AKP <sup>fl/fl</sup> vs. AKP <sup>270/fl</sup> |             | Humans TP53 null vs 273 |             |
|---------------|----------------------------------------------------------|--------------|--------------------------------------------------------|-------------|-------------------------|-------------|
|               | <i>P</i>                                                 | FC           | <i>P</i>                                               | FC          | <i>P</i>                | FC          |
| Trp53         | <b>7.9E-09</b>                                           | <b>0.048</b> | <b>3.6E-05</b>                                         | <b>0.37</b> | <b>2.0E-10</b>          | <b>0.22</b> |
| Cadps         | <b>0.019</b>                                             | <b>0.10</b>  | <b>0.043</b>                                           | <b>0.27</b> | 0.618                   | 1.27        |
| Aspa          | <b>0.033</b>                                             | <b>0.28</b>  | <b>0.042</b>                                           | <b>0.42</b> | 0.965                   | 1.01        |
| Prom2         | <b>0.014</b>                                             | <b>0.45</b>  | <b>0.003</b>                                           | <b>0.61</b> | 0.060                   | 0.41        |
| Grasp         | <b>0.046</b>                                             | <b>0.66</b>  | <b>0.002</b>                                           | <b>0.66</b> | 0.641                   | 1.10        |
| Gabrr1        | <b>0.021</b>                                             | <b>0.72</b>  | <b>0.043</b>                                           | <b>0.73</b> | 0.179                   | 2.35        |
| Olfra45       | <b>0.048</b>                                             | <b>0.76</b>  | <b>0.016</b>                                           | <b>0.71</b> | #N/A                    | #N/A        |
| Pced1b        | <b>0.023</b>                                             | <b>0.77</b>  | <b>0.038</b>                                           | <b>0.68</b> | 0.957                   | 1.01        |
| 1700016P04Rik | <b>0.028</b>                                             | <b>1.30</b>  | <b>0.003</b>                                           | <b>1.35</b> | #N/A                    | #N/A        |
| Wfdc17        | <b>0.026</b>                                             | <b>1.31</b>  | <b>0.042</b>                                           | <b>1.68</b> | #N/A                    | #N/A        |
| Slc35a3       | <b>0.004</b>                                             | <b>1.43</b>  | <b>0.036</b>                                           | <b>1.43</b> | 0.331                   | 0.83        |
| 4930523C07Rik | <b>0.037</b>                                             | <b>1.45</b>  | <b>0.007</b>                                           | <b>1.63</b> | 0.568                   | 0.91        |
| Gm6548        | <b>0.019</b>                                             | <b>1.58</b>  | <b>0.015</b>                                           | <b>1.78</b> | #N/A                    | #N/A        |
| Mir3070b      | <b>0.004</b>                                             | <b>1.99</b>  | <b>0.037</b>                                           | <b>1.35</b> | #N/A                    | #N/A        |
| Mir669c       | <b>0.048</b>                                             | <b>2.17</b>  | <b>0.004</b>                                           | <b>1.46</b> | #N/A                    | #N/A        |
| Ngef          | 0.674                                                    | 0.88         | <b>0.000</b>                                           | <b>1.49</b> | <b>0.010</b>            | <b>1.70</b> |
| Il6ra         | 0.535                                                    | 0.80         | <b>0.020</b>                                           | <b>0.51</b> | <b>0.012</b>            | <b>0.63</b> |
| Evx2          | 0.922                                                    | 1.01         | <b>0.002</b>                                           | <b>0.74</b> | <b>0.012</b>            | <b>0.62</b> |
| Srd5a3        | 0.264                                                    | 1.11         | <b>0.003</b>                                           | <b>0.67</b> | <b>0.024</b>            | <b>0.61</b> |
| Smarcd3       | 0.773                                                    | 0.94         | <b>0.038</b>                                           | <b>0.72</b> | <b>0.025</b>            | <b>0.65</b> |
| Fzd2          | 0.997                                                    | 1.00         | <b>0.020</b>                                           | <b>0.74</b> | <b>0.036</b>            | <b>0.50</b> |
| Sgsm1         | 0.878                                                    | 0.98         | <b>0.017</b>                                           | <b>0.70</b> | <b>0.036</b>            | <b>0.49</b> |
| Gnai1         | 0.832                                                    | 0.88         | <b>0.018</b>                                           | <b>0.49</b> | <b>0.047</b>            | <b>0.58</b> |
| Etv5          | 0.799                                                    | 0.94         | <b>0.050</b>                                           | <b>0.56</b> | <b>0.048</b>            | <b>0.55</b> |

*P*: *P*-values based on ANOVA models described in results. FC: fold-change. Human genes were mapped to mouse 1-to-1 best homologs using build 68 of NCBI's Homologene.

**Supplementary Table 5. Clinicopathological features of TCGA samples used for comparison of TP53 null mutations with mutations at amino acid 273**

| Person       | TP53 | Age | Dead | Days | Tissue_site | Stage12 | Stage | P_stage    | T_stage | N_stage | M_stage | Gender | Year | Radiation therapy | Histological_type              | Residual tumor |
|--------------|------|-----|------|------|-------------|---------|-------|------------|---------|---------|---------|--------|------|-------------------|--------------------------------|----------------|
| TCGA-AA-3949 | R273 | 87  | 0    | 791  | colon       | s34     | s3    | stage_iiib | t3      | n1      | m0      | female | 2009 | no                | colon_mucinous_adenocarcinoma  | r0             |
| TCGA-AA-3556 | R273 | 78  | 0    | 700  | colon       | s12     | s1    | stage_i    | t2      | n0      | m0      | male   | 2008 | no                | NA                             | r0             |
| TCGA-AA-3561 | R273 | 72  | 0    | 424  | colon       | s12     | s2    | stage_iiia | t3      | n0      | m0      | male   | 2009 | no                | colon_adenocarcinoma           | r0             |
| TCGA-AA-3844 | R273 | 78  | 0    | 454  | colon       | s34     | s3    | stage_iiic | t3      | n2      | m0      | female | 2009 | yes               | colon_adenocarcinoma           | r0             |
| TCGA-AA-A01D | R273 | 47  | 1    | 334  | colon       | s34     | s3    | stage_iiic | t3      | n2      | m0      | female | 2009 | no                | colon_mucinous_adenocarcinoma  | r0             |
| TCGA-AY-4070 | R273 | 50  | 1    | 496  | colon       | s34     | s3    | stage_iiic | t3      | n2      | m0      | female | 2007 | no                | colon_adenocarcinoma           | r1             |
| TCGA-AG-3578 | R273 | 76  | 0    | 974  | rectum      | s12     | s2    | stage_iiia | t3      | n0      | m0      | female | 2007 | no                | rectal_mucinous_adenocarcinoma | r0             |
| TCGA-AG-3581 | R273 | 63  | 0    | 215  | rectum      | s12     | s1    | stage_i    | t2      | n0      | m0      | male   | 2007 | no                | rectal_adenocarcinoma          | r0             |
| TCGA-AG-3587 | R273 | 65  | 0    | 1400 | rectum      | s12     | s1    | stage_i    | t2      | n0      | m0      | male   | 2007 | yes               | rectal_adenocarcinoma          | r0             |
| TCGA-AA-3811 | null | 84  | 1    | 306  | colon       | s34     | s3    | stage_iii  | t3      | n2      | m0      | female | 2007 | no                | colon_adenocarcinoma           | r0             |
| TCGA-AG-A02N | null | 67  | 0    | 1885 | rectum      | s12     | s2    | stage_ii   | t3      | n0      | m0      | male   | 2005 | NA                | rectal_adenocarcinoma          | r0             |
| TCGA-AA-3517 | null | 60  | 0    | 1186 | colon       | s12     | s2    | stage_iiia | t3      | n0      | m0      | male   | 2007 | no                | colon_adenocarcinoma           | r0             |
| TCGA-AA-3866 | null | 78  | 0    | 518  | colon       | s12     | s1    | stage_i    | t2      | n0      | m0      | female | 2006 | no                | colon_adenocarcinoma           | r0             |
| TCGA-AA-3930 | null | 66  | 1    | 61   | colon       | s34     | s4    | stage_iv   | t3      | n2      | m1      | male   | 2008 | no                | colon_adenocarcinoma           | r2             |
| TCGA-AA-3972 | null | 72  | 0    | 1551 | colon       | s34     | s4    | stage_iv   | t3      | n1      | m1      | male   | 2008 | no                | colon_adenocarcinoma           | r2             |
| TCGA-AA-A00O | null | 83  | 0    | 822  | colon       | s34     | s3    | stage_iiic | t3      | n2      | m0      | female | 2008 | no                | colon_adenocarcinoma           | r0             |
| TCGA-AA-A02W | null | 73  | 0    | 1247 | colon       | s12     | s1    | stage_i    | t2      | n0      | m0      | female | 2006 | no                | colon_adenocarcinoma           | r0             |
| TCGA-AG-4001 | null | 74  | 0    | 1096 | rectum      | s12     | s2    | stage_iiia | t3      | n0      | m0      | female | 2009 | no                | rectal_adenocarcinoma          | r0             |
| TCGA-A6-2678 | null | 43  | 0    | 1286 | colon       | s34     | s3    | stage_iiib | t3      | n1      | m0      | female | 2009 | no                | colon_adenocarcinoma           | r0             |
| TCGA-A6-3807 | null | 53  | 0    | 1054 | colon       | s34     | s3    | stage_iiic | t3      | n2      | m0      | female | 2009 | no                | colon_adenocarcinoma           | r0             |
| TCGA-AA-3524 | null | 85  | 0    | 1096 | colon       | s12     | s2    | stage_ii   | t3      | n0      | m0      | male   | 2007 | no                | colon_adenocarcinoma           | r0             |
| TCGA-AA-3560 | null | 72  | 0    | 608  | colon       | s34     | s3    | stage_iiic | t3      | n2      | m0      | female | 2009 | no                | colon_adenocarcinoma           | r0             |
| TCGA-AA-3673 | null | 53  | 0    | 1522 | colon       | s12     | s2    | stage_ii   | t3      | n0      | m0      | female | 2006 | no                | colon_adenocarcinoma           | r0             |
| TCGA-AA-3842 | null | 51  | 0    | 1126 | colon       | s34     | s3    | stage_iiia | t2      | n1      | m0      | male   | 2009 | no                | colon_adenocarcinoma           | r0             |
| TCGA-AA-3848 | null | 82  | 1    | 306  | colon       | s34     | s3    | stage_iiic | t3      | n2      | m0      | female | 2009 | no                | colon_adenocarcinoma           | r0             |
| TCGA-AA-3856 | null | 59  | 0    | 30   | colon       | s12     | s2    | stage_iiia | t3      | n0      | m0      | male   | 2009 | NA                | colon_adenocarcinoma           | r0             |
| TCGA-AA-3858 | null | 67  | 0    | 945  | colon       | s12     | s1    | stage_i    | t2      | n0      | m0      | male   | 2009 | no                | colon_adenocarcinoma           | r0             |
| TCGA-AA-3860 | null | 53  | 0    | 945  | colon       | s34     | s3    | stage_iiib | t3      | n1      | m0      | female | 2009 | no                | colon_adenocarcinoma           | r0             |
| TCGA-AA-3867 | null | 74  | 0    | 731  | colon       | s34     | s4    | stage_iv   | t3      | n2      | m1      | male   | 2007 | no                | colon_adenocarcinoma           | r2             |
| TCGA-AA-3955 | null | 38  | 0    | 638  | colon       | s34     | s3    | stage_iiib | t2      | n2a     | m0      | male   | 2010 | no                | colon_adenocarcinoma           | r0             |
| TCGA-AA-3977 | null | 65  | 0    | 761  | colon       | NA      | NA    | NA         | t2      | n0      | NA      | male   | 2009 | no                | colon_adenocarcinoma           | NA             |
| TCGA-AA-A00D | null | 70  | 0    | 578  | colon       | s12     | s1    | stage_i    | t2      | n0      | m0      | male   | 2007 | no                | colon_adenocarcinoma           | r0             |
| TCGA-AA-A01Z | null | 68  | 0    | 1126 | colon       | s12     | s2    | stage_ii   | t3      | n0      | m0      | male   | 2004 | no                | colon_adenocarcinoma           | r0             |
| TCGA-AG-3890 | null | 62  | 0    | 518  | rectum      | s12     | s1    | stage_i    | t2      | n0      | m0      | male   | 2009 | no                | rectal_adenocarcinoma          | r0             |
| TCGA-AG-3898 | null | 61  | 0    | 1461 | rectum      | s12     | s2    | stage_iiia | t3      | n0      | m0      | male   | 2006 | no                | rectal_adenocarcinoma          | r0             |
| TCGA-AG-4005 | null | 64  | 0    | 427  | rectum      | s34     | s4    | stage_iv   | t3      | n2      | m1      | male   | 2007 | no                | rectal_adenocarcinoma          | r0             |
| TCGA-AG-A026 | null | 66  | 1    | 59   | rectum      | s12     | s2    | stage_ii   | t4      | n0      | m0      | male   | 2006 | NA                | rectal_adenocarcinoma          | r1             |
| TCGA-AG-A02X | null | 77  | 0    | 1247 | rectum      | s12     | s1    | stage_i    | t2      | n0      | m0      | male   | 2007 | NA                | rectal_adenocarcinoma          | r0             |
| TCGA-AA-3553 | null | 61  | 0    | 730  | colon       | s12     | s1    | stage_i    | t2      | n0      | m0      | female | 2008 | no                | colon_adenocarcinoma           | r0             |
| TCGA-A6-2674 | null | 71  | 0    | 1331 | colon       | s34     | s4    | stage_iv   | t3      | n2      | m1      | male   | 2009 | no                | colon_mucinous_adenocarcinoma  | r0             |
| TCGA-AA-3980 | null | 89  | 0    | 822  | colon       | s12     | s1    | stage_i    | t2      | n0      | m0      | female | 2009 | no                | colon_adenocarcinoma           | NA             |
| TCGA-AG-3594 | null | 77  | 1    | 61   | rectum      | s12     | s2    | stage_iiia | t3      | n0      | m0      | male   | 2007 | no                | rectal_mucinous_adenocarcinoma | r0             |
| TCGA-AG-3999 | null | 61  | 0    | 853  | rectum      | s34     | s3    | stage_iiic | t3      | n2      | m0      | female | 2008 | no                | rectal_adenocarcinoma          | r0             |
